# Supplementary material
Source: PubMed Central journal article supplement (PMC7615285)

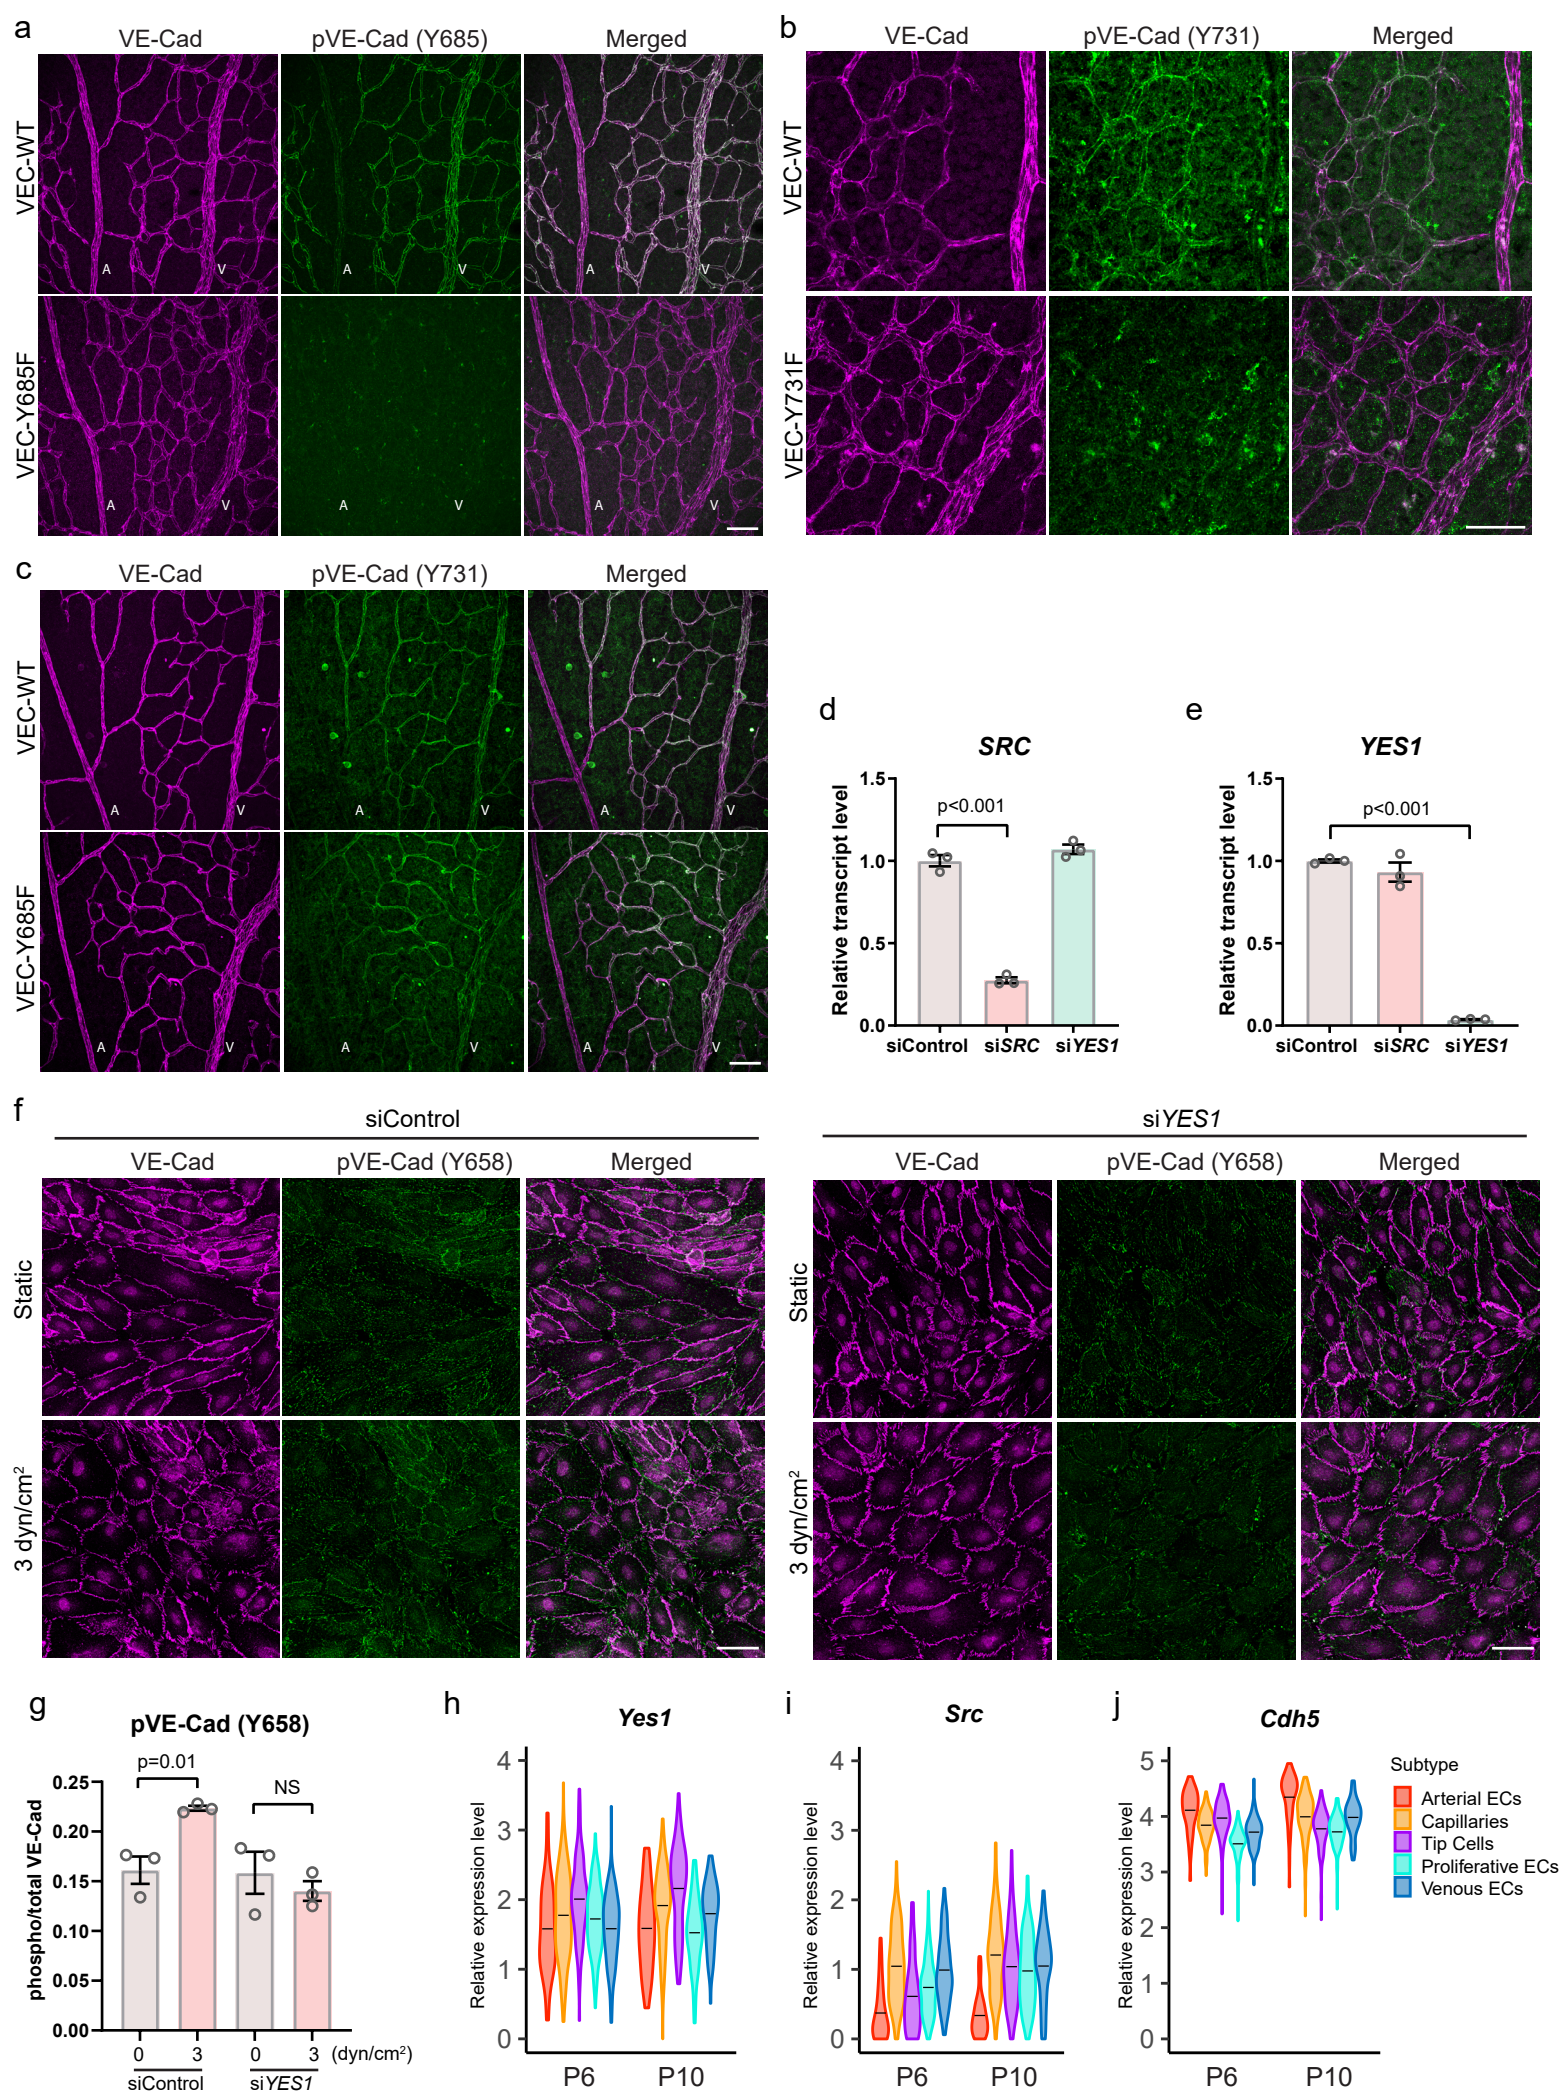



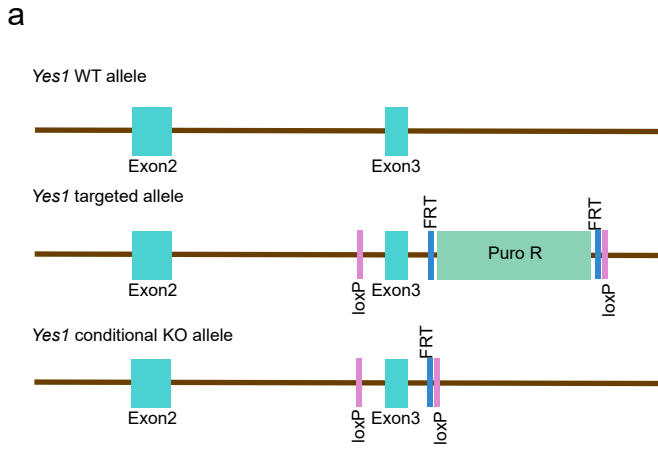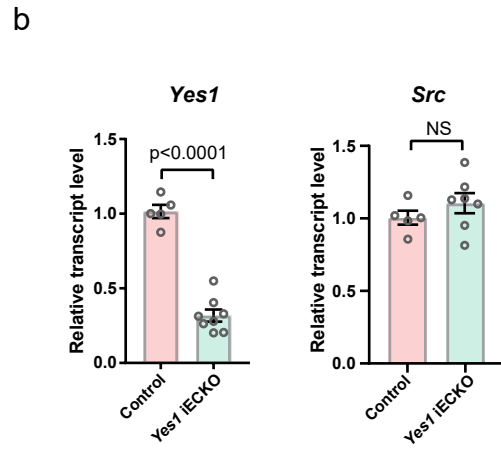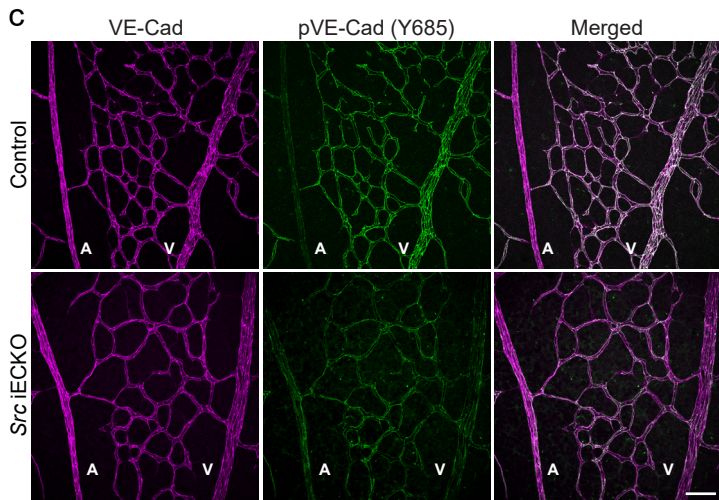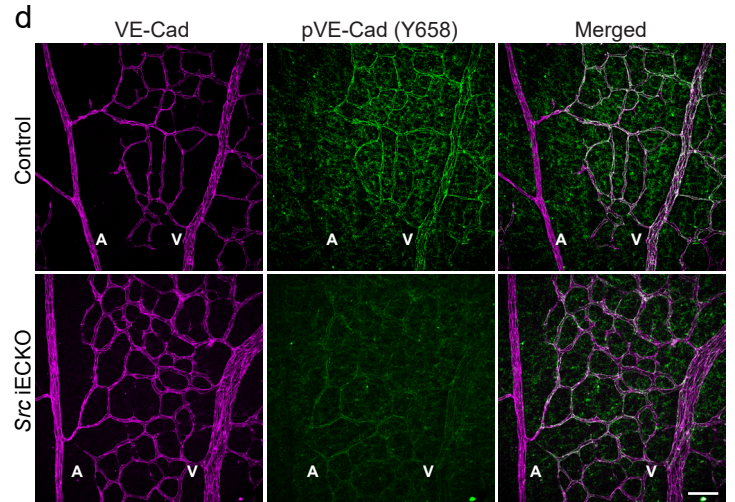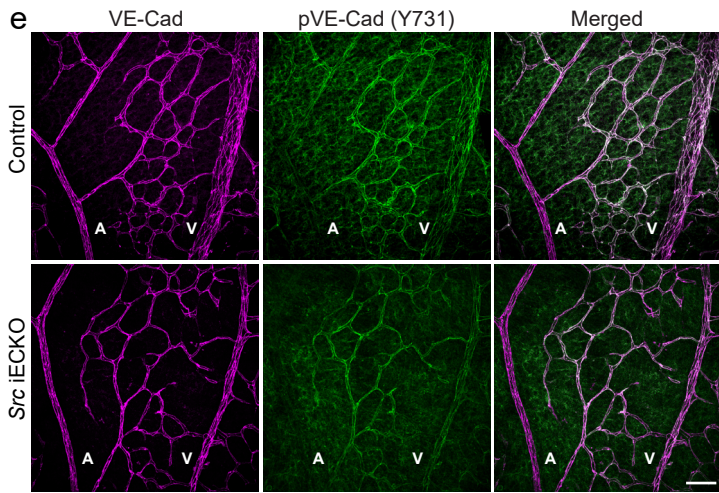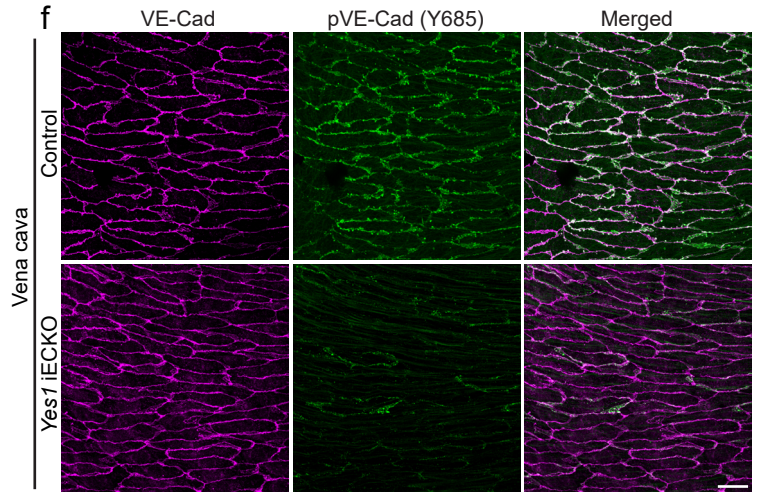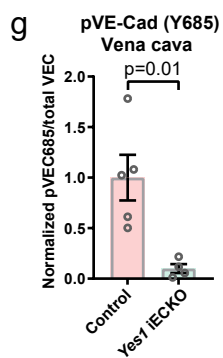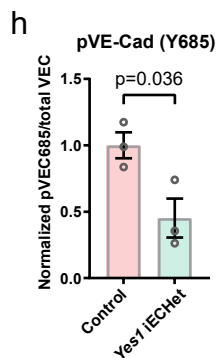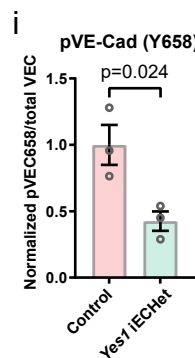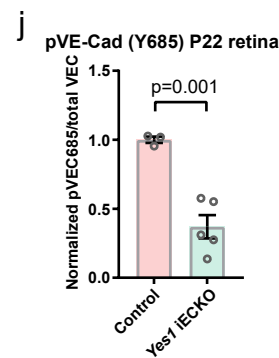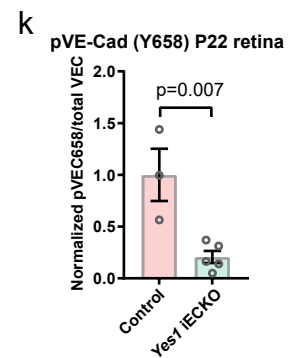



**a**

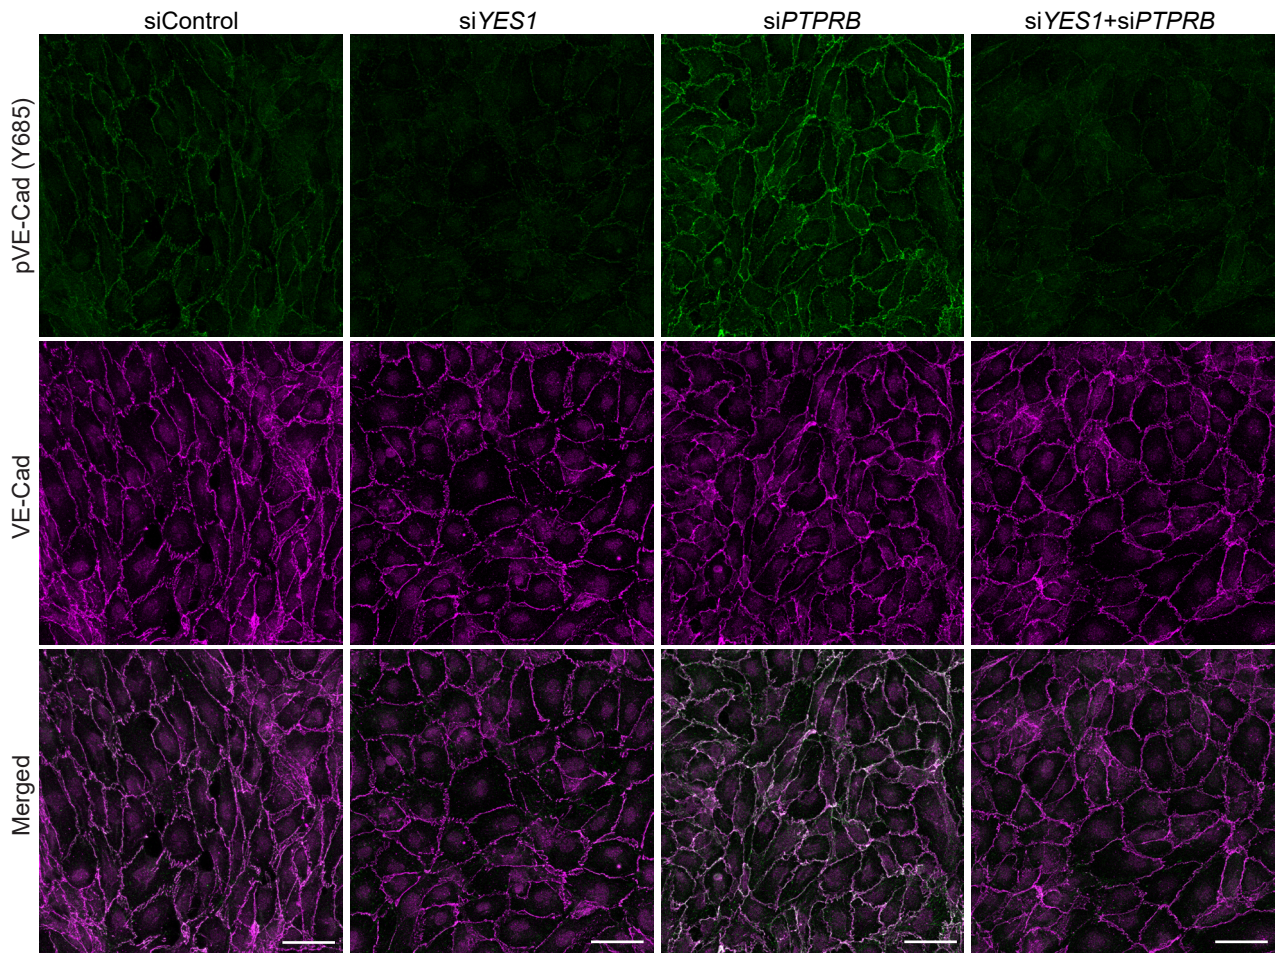

**b**

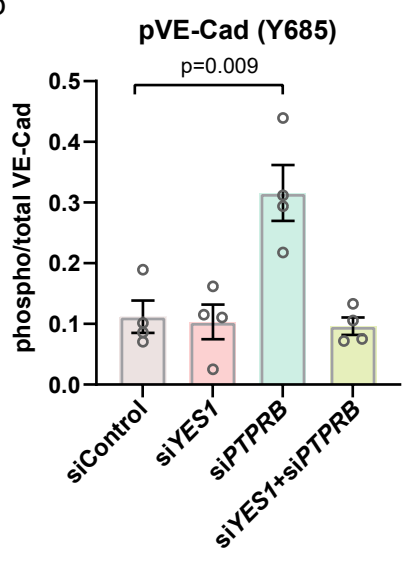

**c**

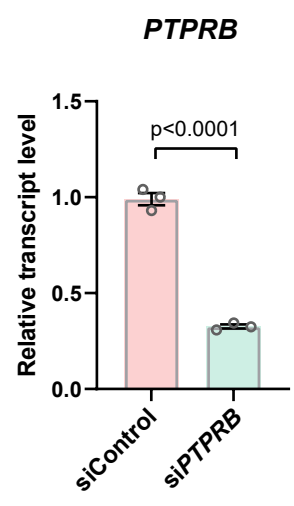



**a** Targeted allele for *Yes1* overexpression

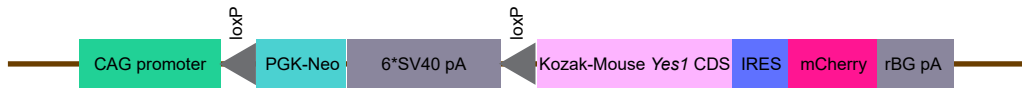

**b** Yes VE-Cad Merged

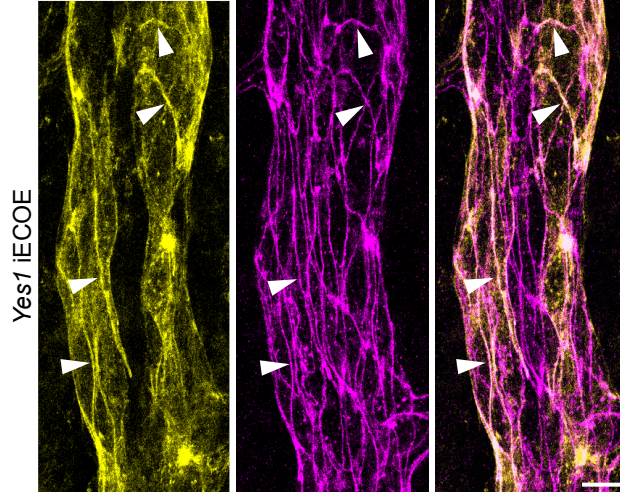

**c** *Yes1* iECOEs

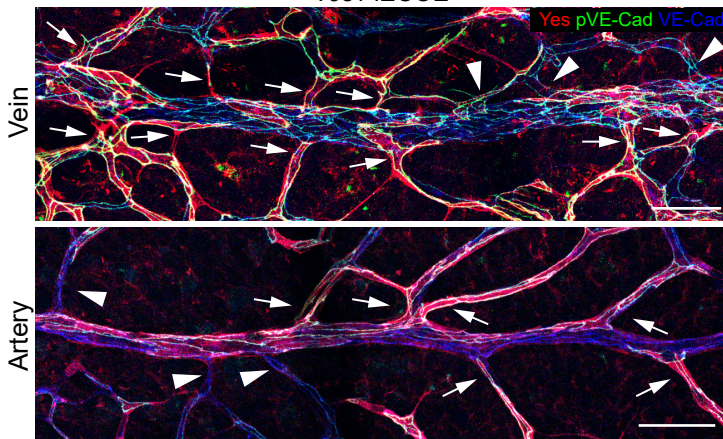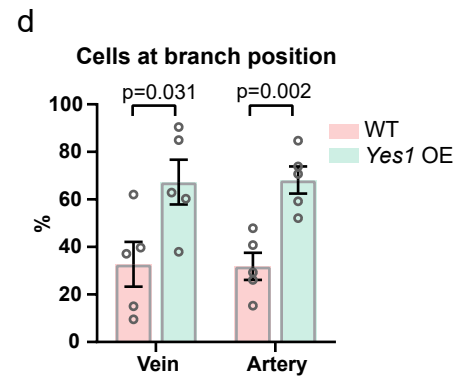



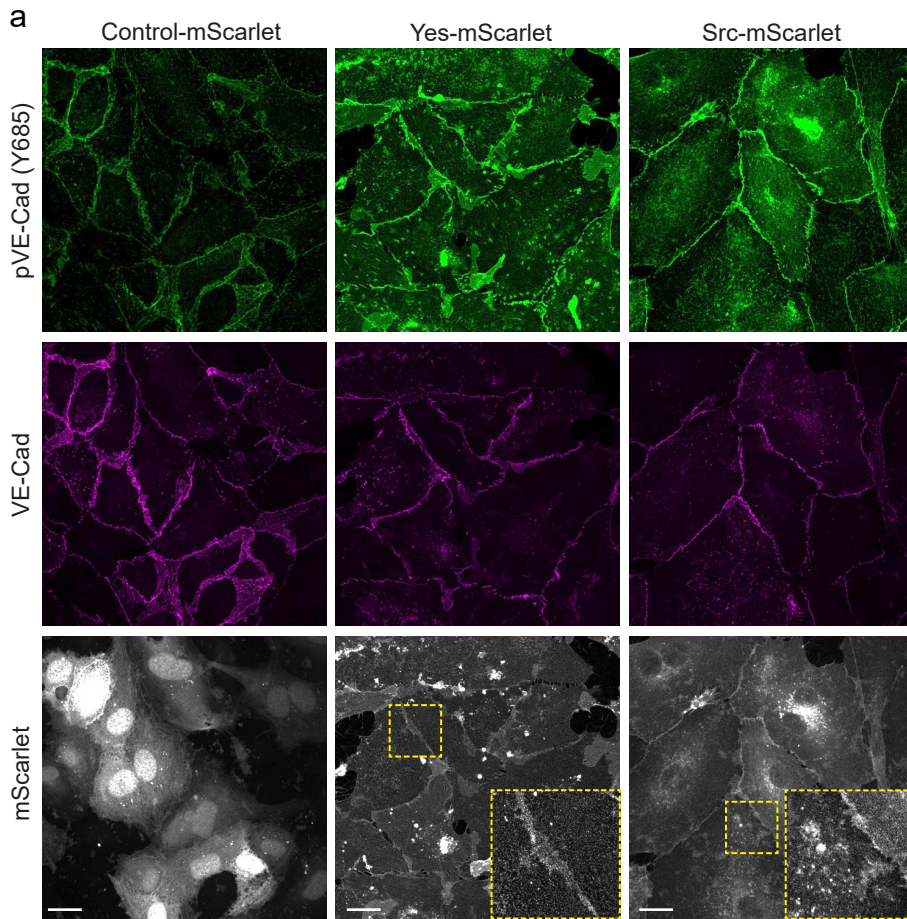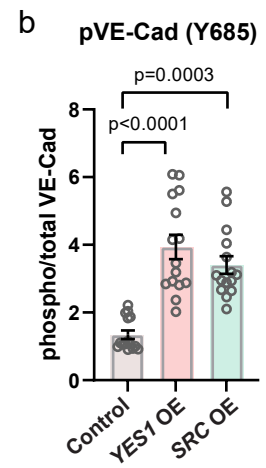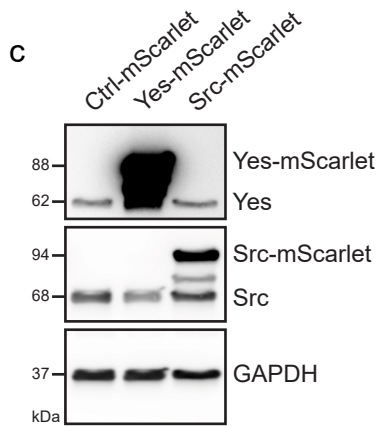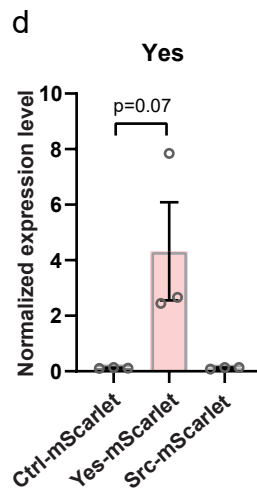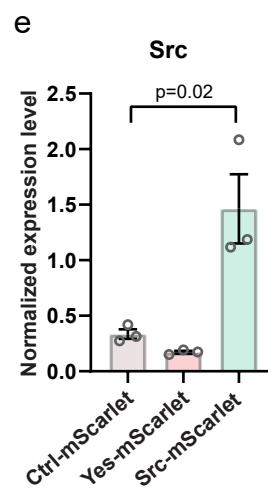



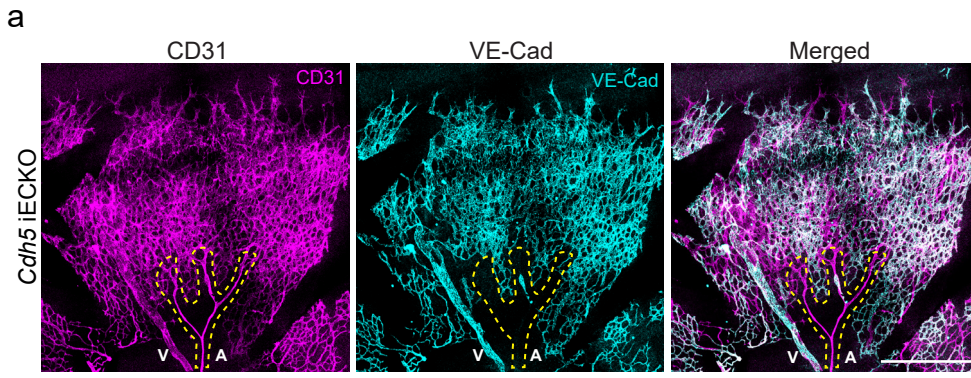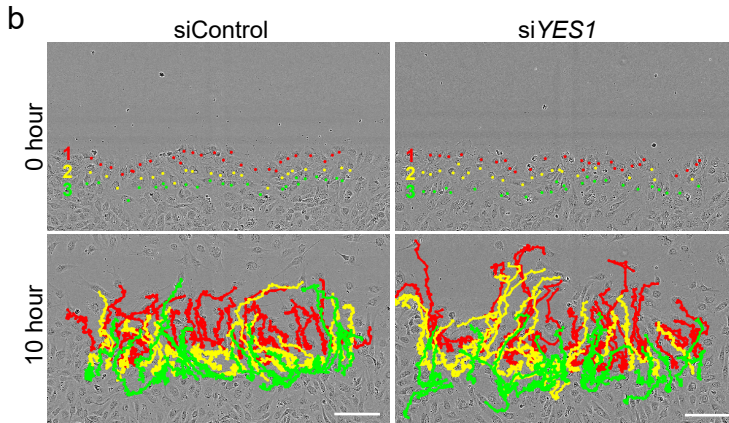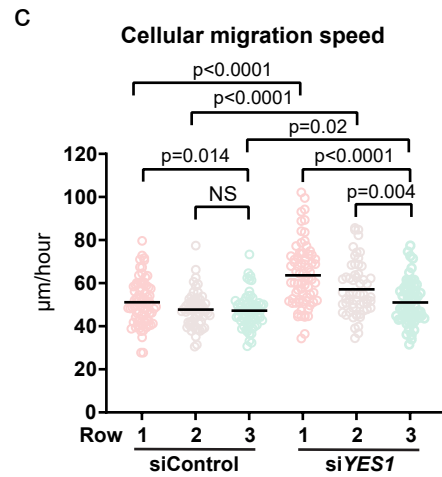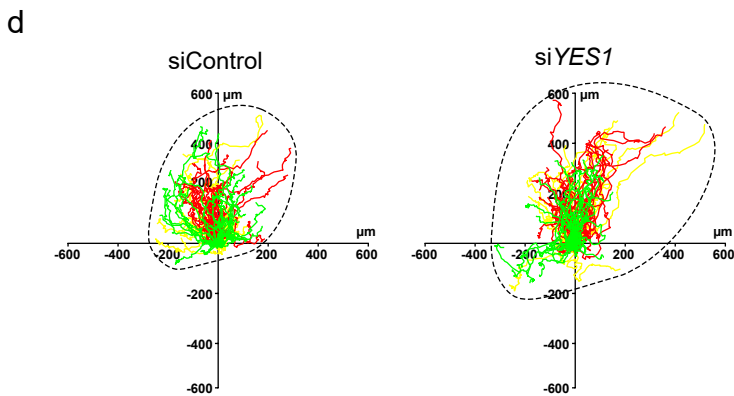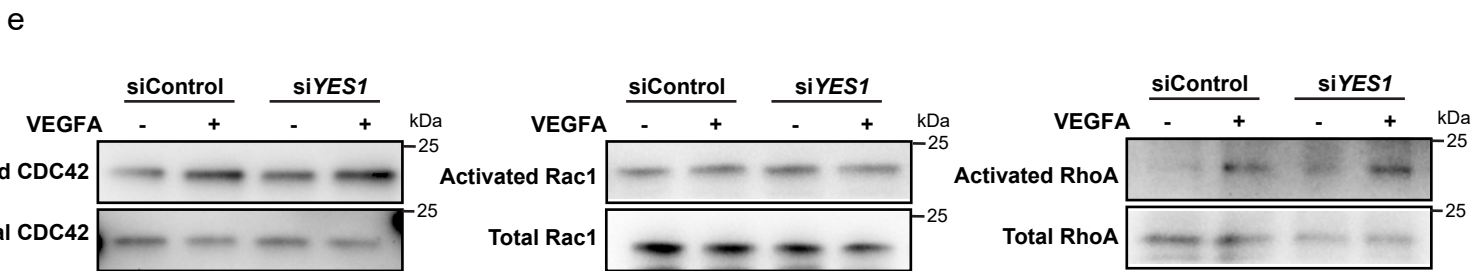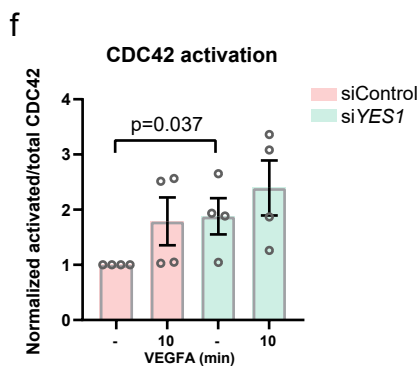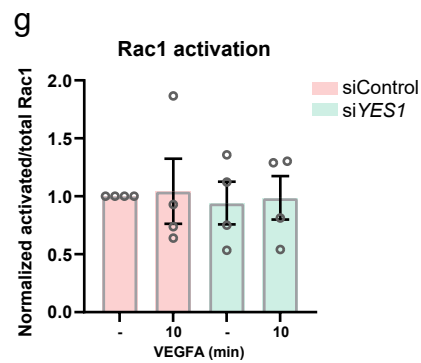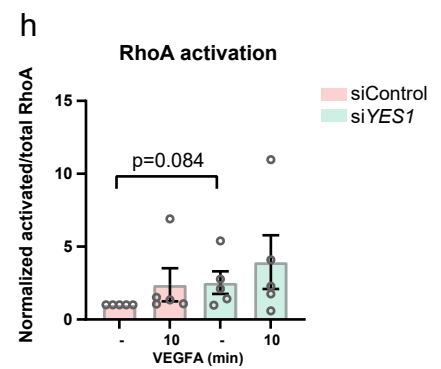



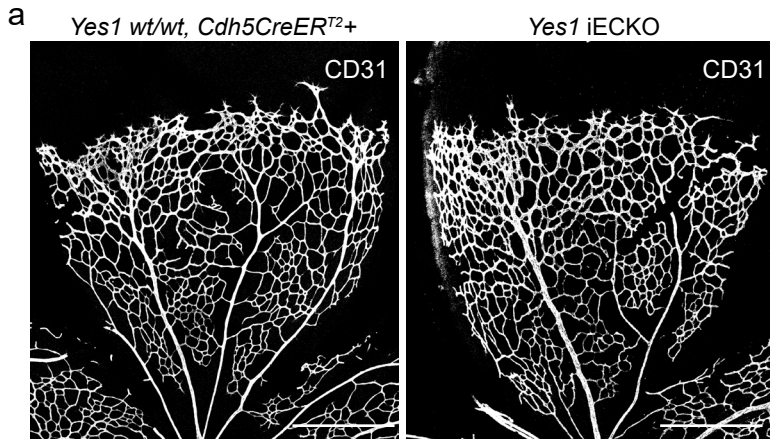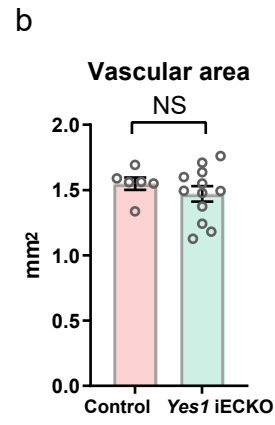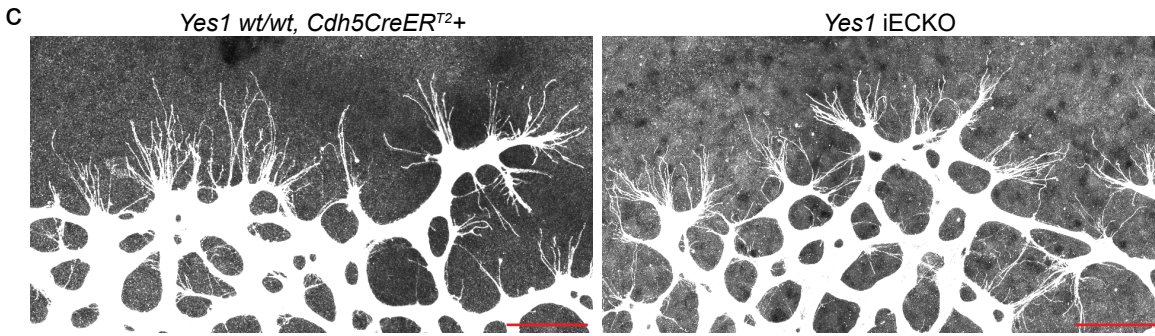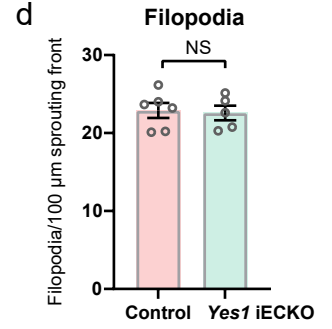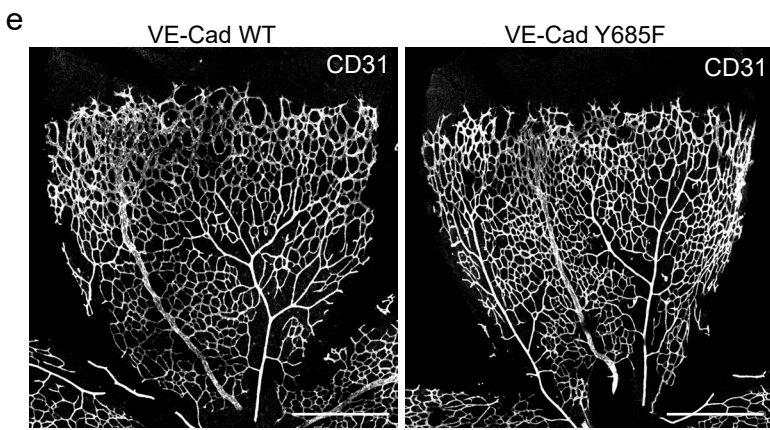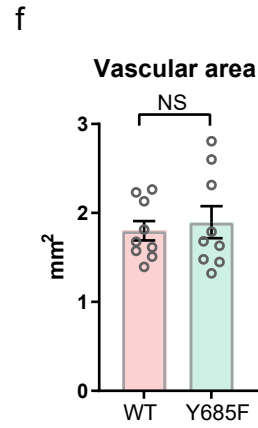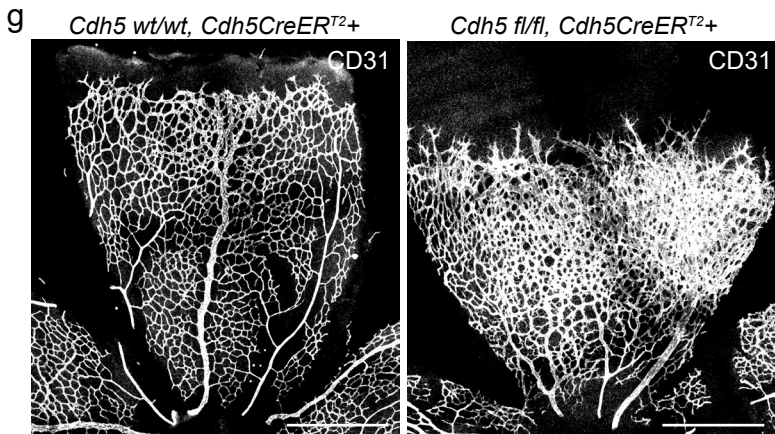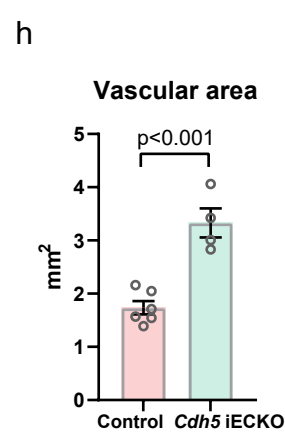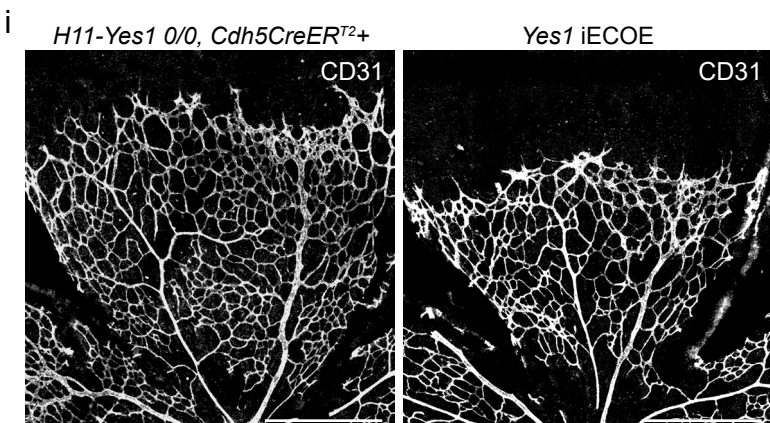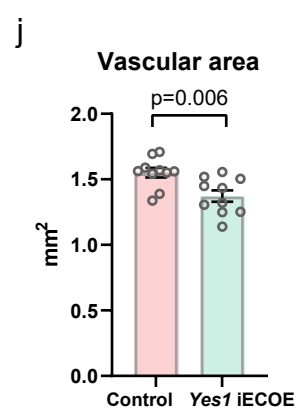



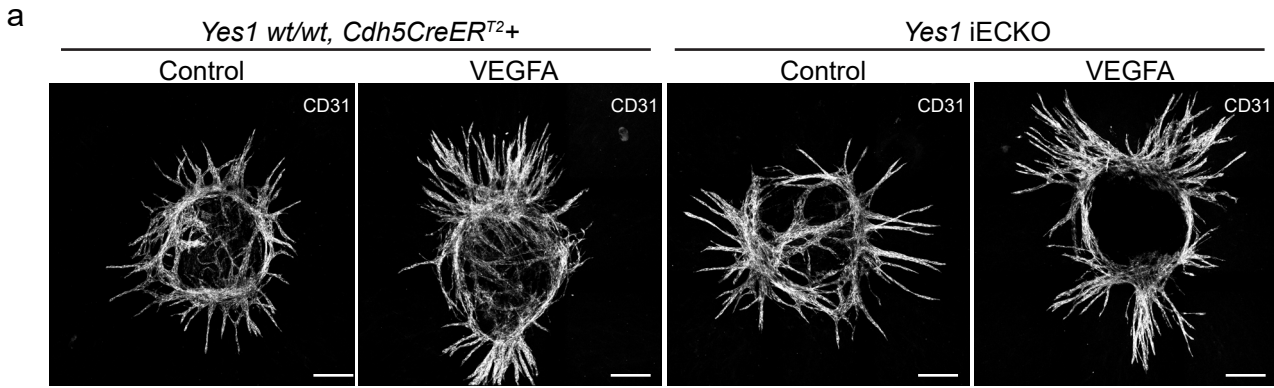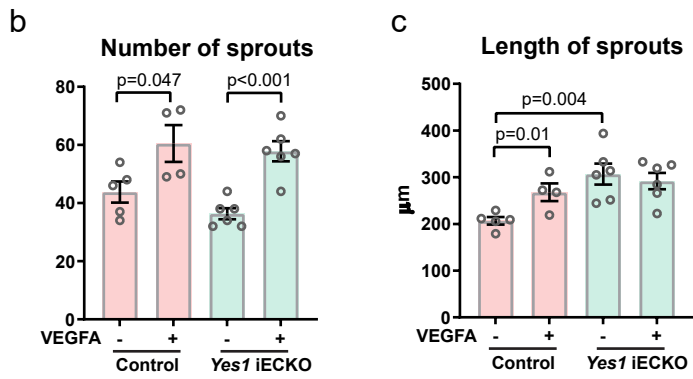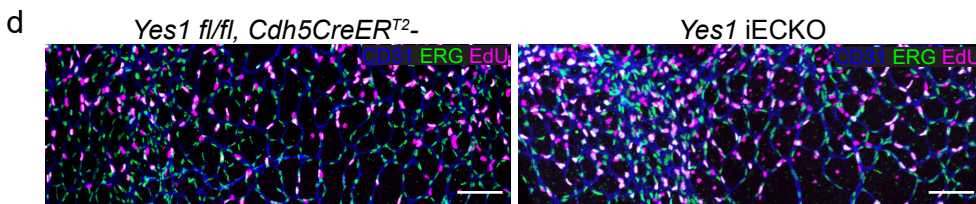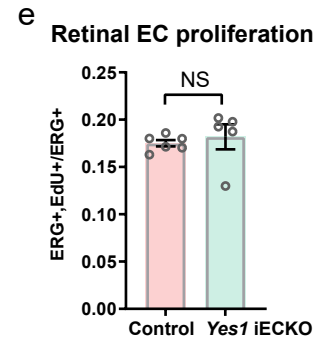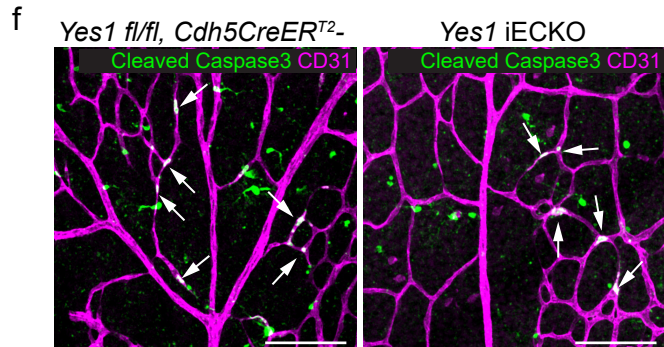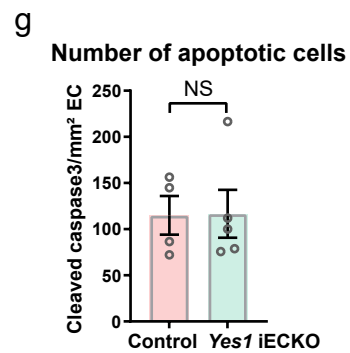



Artery

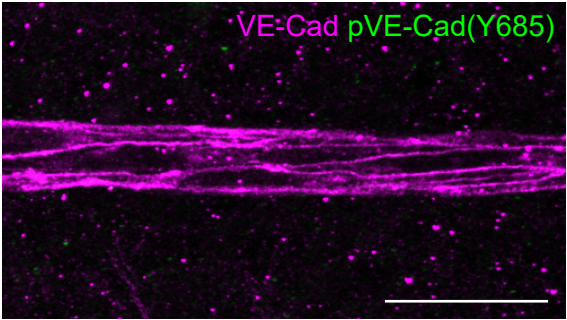

Vein

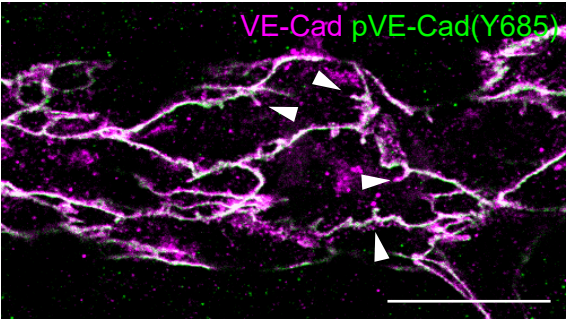

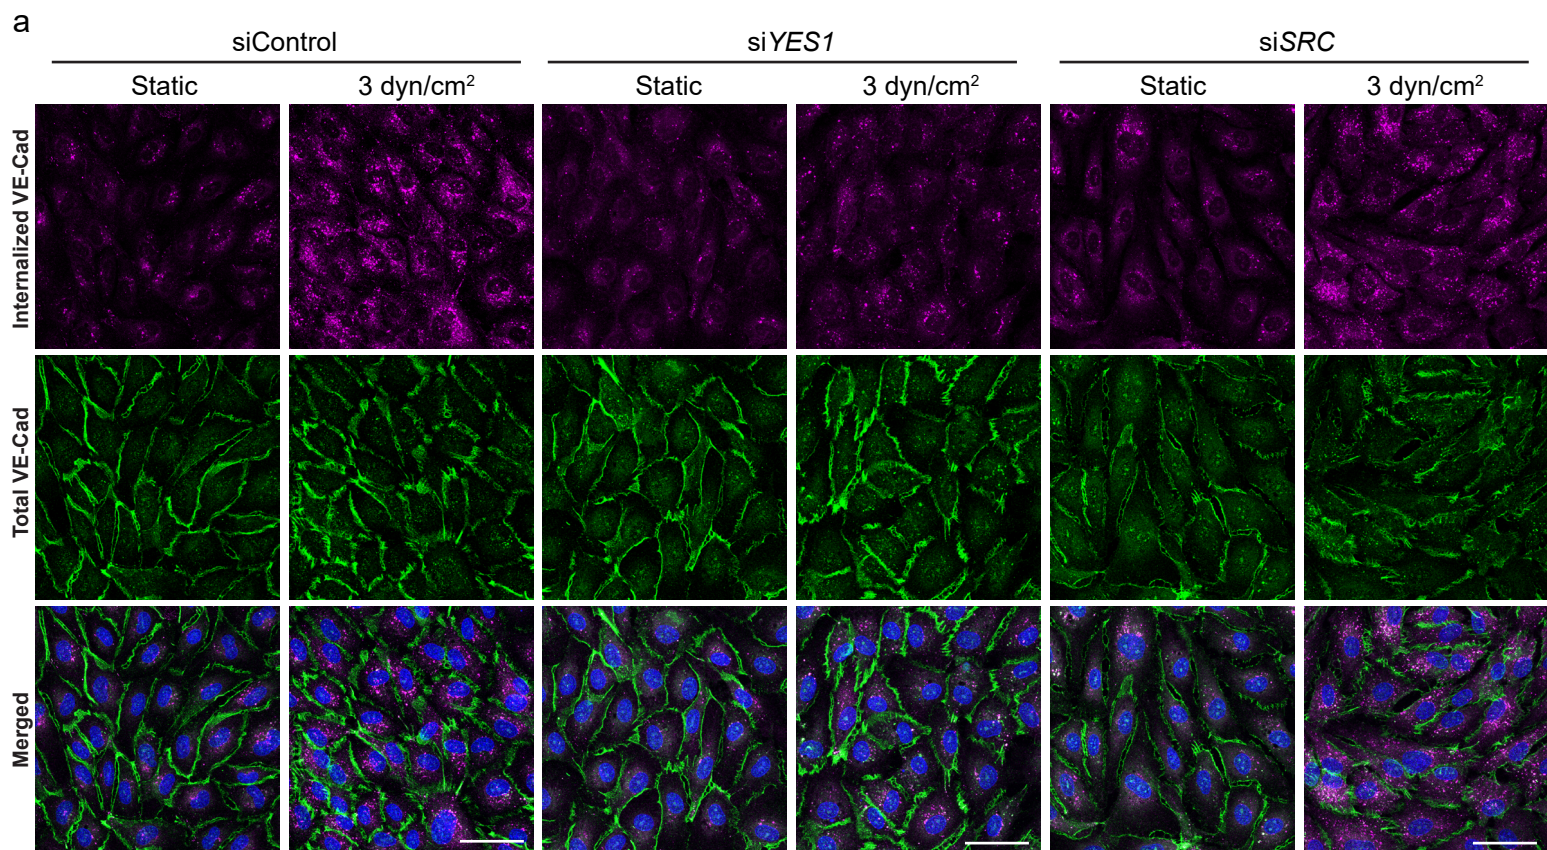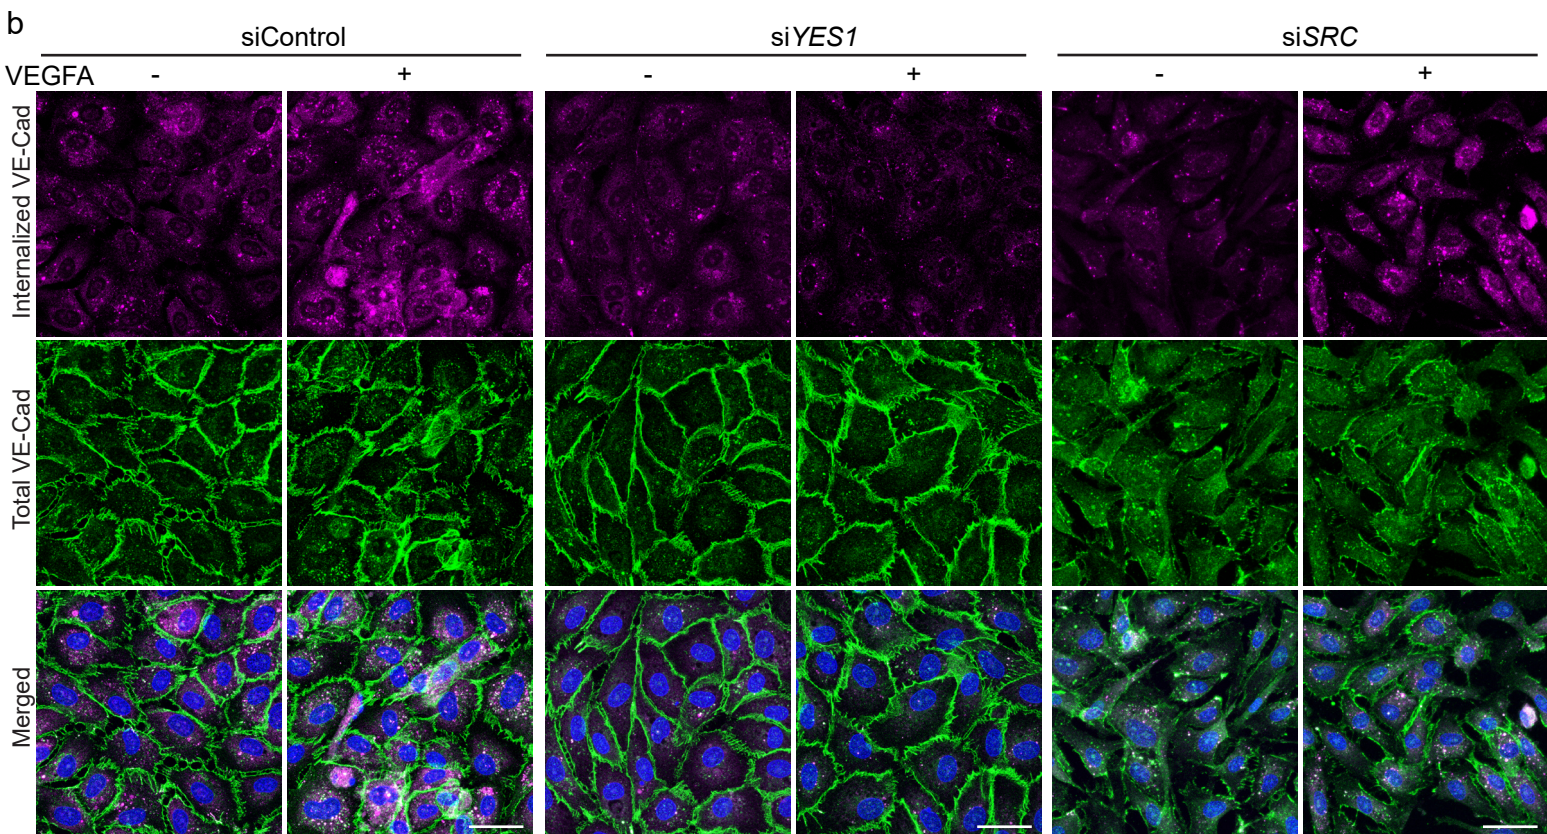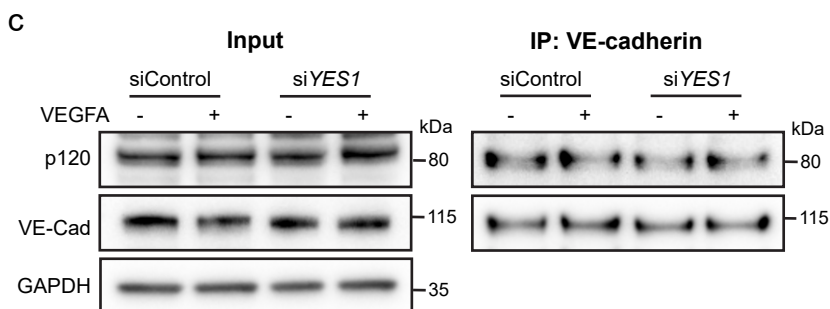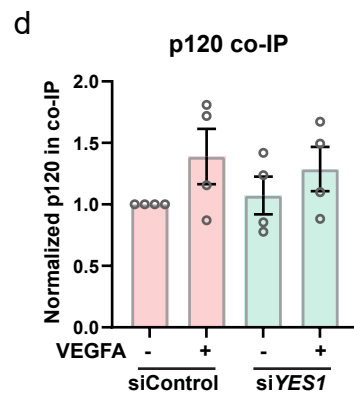



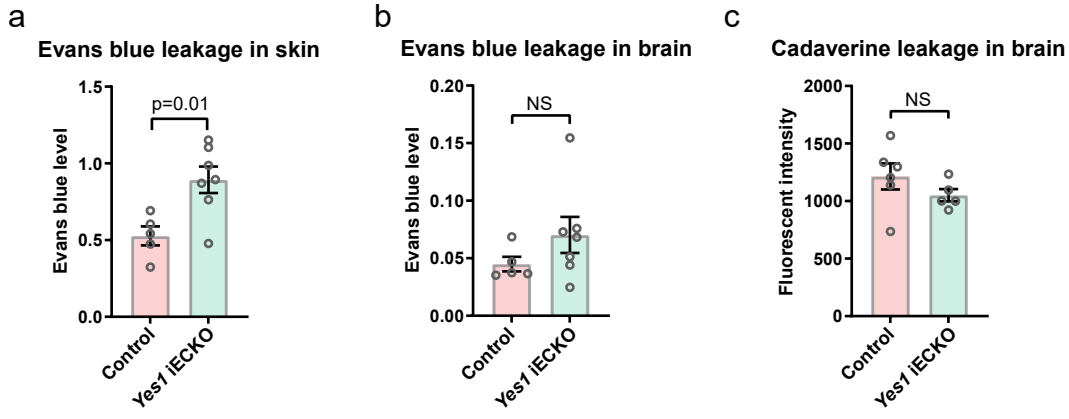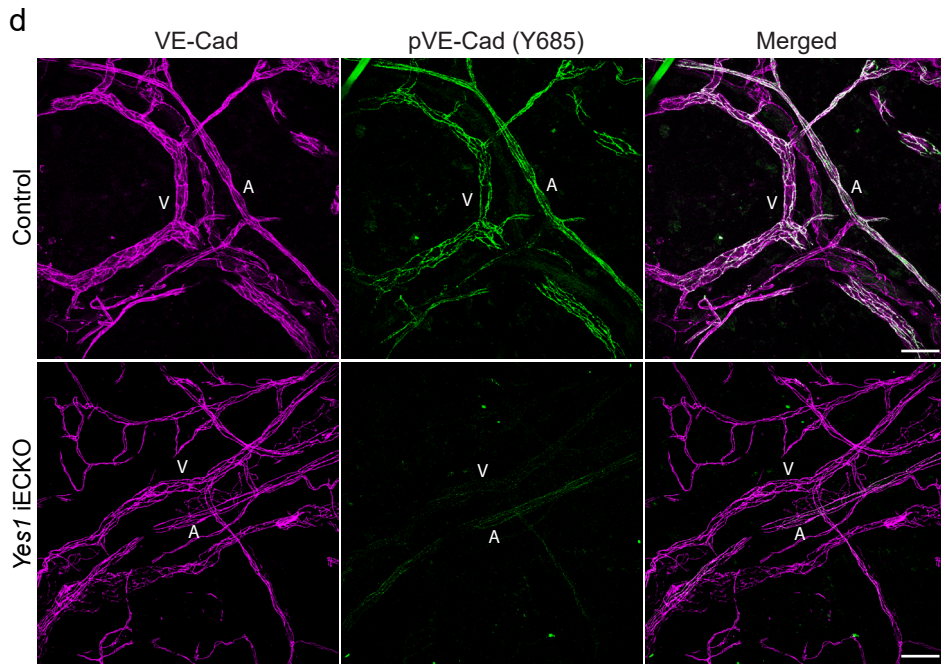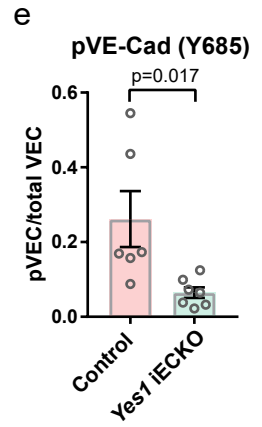

Supplement: EMS189990-supplement-Extended_data_Fig__1.pdf [file EMS189990-supplement-Extended_data_Fig__1.pdf]
